# Supplementary material for: Effect of the Addition of Dandelion (Taraxacum officinale) on the Protein Profile, Antiradical Activity, and Microbiological Status of Raw-Ripening Pork Sausage
Source: MDPI journal article supplement (doi:10.3390/molecules29102249), 2024-05-10
Supplement: s1 [file s1]

## Article

# Effect of the Addition of Dandelion (*Taraxacum officinale*) on the Protein Profile, Antiradical Activity, and Microbiological Status of Raw-Ripening Pork Sausage

Karolina Wójciak <sup>1,\*</sup>, Małgorzata Materska <sup>2</sup>, Arkadiusz Pełka <sup>1</sup>, Agata Michalska <sup>1</sup>, Teresa Małecka-Massalska <sup>3</sup>, Mirosława Kaćaniová <sup>4,5</sup>, Natália Čmiková <sup>4</sup>, and Mirosław Słowiński <sup>6</sup>

**Citation:** Wójciak, K.; Materska, M.; Pełka, A.; Michalska, A.; Małecka-Massalska, T.; Kaćaniová, M.; Čmiková, N.; Słowiński, M. Effect of the addition of dandelion (*Taraxacum officinale*) on the protein profile, antiradical activity, and microbiological status of raw-ripening pork sausage.

*Molecules* **2024**, *29*, 2249. <https://doi.org/10.3390/molecules29102249>

Academic Editor: Adele Papetti

Received: 22 March 2024

Revised: 29 April 2024

Accepted: 29 April 2024

Published: 10 May 2024

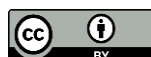

**Copyright:** © 2024 by the authors. Submitted for possible open access publication under the terms and conditions of the Creative Commons Attribution (CC BY) license (<https://creativecommons.org/licenses/by/4.0/>).

<sup>1</sup> Department of Animal Food Technology, Faculty of Food Science and Biotechnology, University of Life Sciences in Lublin, Skromna 8, 20-704 Lublin, Poland

<sup>2</sup> Department of Chemistry, Faculty of Food Science and Biotechnology, University of Life Sciences in Lublin, Akademicka 15, 20-950 Lublin, Poland

<sup>3</sup> Chair and Department of Human Physiology, Medical University of Lublin, Radziwiłłowska 11, 20-080 Lublin, Poland

<sup>4</sup> Institute of Horticulture, Faculty of Horticulture and Landscape Engineering, Slovak University of Agriculture, Tr. A. Hlinku 2, 94976 Nitra, Slovakia; mirosława.kacaniova@gmail.com (M.K.), n.cmikova@gmail.com (N.Č)

<sup>5</sup> School of Medical & Health Sciences, University of Economics and Human Sciences in Warsaw, Okopowa 59, 01 043 Warszawa, Poland; m.kacaniova@vizja.pl (M.K.)

<sup>6</sup> Division of Meat Technology, Department of Food Technology and Food Evaluation, Institute of Food Sciences, Warsaw University of Life Sciences-SGGW, 02-787 Warsaw, Poland

\* Correspondence: karolina.wojciak@up.lublin.pl; Tel.: +81 4623340

## S.1. Qualitative analysis of dandelion extract

LC-QTOF-MS analyses were performed to estimate the qualitative composition of the tested extract. The presence of five compounds was revealed by the analysis of mass spectra of their standards. For these compounds, the LC-MS analyses were performed in the *scan* mode to confirm their retention times and in the *target* mode to confirm their fragmentation spectra. Other compounds were identified on the basis of literature data and available databases (PubChem, ChemSpider). In Table S1 precursor ions for each identified compound as well as compound CID number described in the Pub Chem database are inserted. All compounds were earlier identified in dandelion, which was confirmed by appropriate references.

**Table S1.** Identification of phenolic compounds in dandelion leaf water extract determined with the LCMS-ESI-QTOF method in positive (ESI+) ionization modes.

| No | Name*                         | R <sub>t</sub> | Molecular formula                               | Precursor type     | Precursor m/z | Precursor type      | Precursor m/z | PubChem       | Identification /confirmation |
|----|-------------------------------|----------------|-------------------------------------------------|--------------------|---------------|---------------------|---------------|---------------|------------------------------|
|    |                               |                |                                                 |                    |               |                     |               | Com-pound CID |                              |
| 1  | Neochlorogenic acid           | 1.274          | C <sub>16</sub> H <sub>18</sub> O <sub>9</sub>  | [M+H] <sup>+</sup> | 355.102       | -                   | -             | 5280633       | [2, 3]                       |
| 2  | Caffeoyltartaric acid         | 1.307          | C <sub>13</sub> H <sub>12</sub> O <sub>9</sub>  | [M+H] <sup>+</sup> | 313.0556      | [M+Na] <sup>+</sup> | 335.0377      | 6440397       | [1, 2]                       |
| 3  | 7-hydroxycoumarin             | 1.307          | C <sub>9</sub> H <sub>6</sub> O <sub>3</sub>    | [M+H] <sup>+</sup> | 163.039       | -                   | -             | 5281426       | [4]                          |
| 4  | Cichoriin                     | 1.623          | C <sub>15</sub> H <sub>16</sub> O <sub>9</sub>  | [M+H] <sup>+</sup> | 341.0871      | [M+Na] <sup>+</sup> | 363.0589      | 442101        | [4]                          |
| 5  | Esculetin                     | 2.772          | C <sub>9</sub> H <sub>6</sub> O <sub>4</sub>    | [M+H] <sup>+</sup> | 179.0347      | -                   | -             | 5281416       | [4]                          |
| 6  | Dihydrosyringin               | 3.288          | C <sub>17</sub> H <sub>26</sub> O <sub>9</sub>  | [M+H] <sup>+</sup> | 375.169       | [M+Na] <sup>+</sup> | 397.147       | 71720642      | [4]                          |
| 7  | Taraxafolin                   | 3.738          | C <sub>11</sub> H <sub>14</sub> O <sub>5</sub>  | [M+H] <sup>+</sup> | 227.093       | -                   | -             | 10987942      | [4]                          |
| 8  | Quercetin-3-O-Ara-Glc         | 3.821          | C <sub>26</sub> H <sub>28</sub> O <sub>16</sub> | [M+H] <sup>+</sup> | 597.1455      | -                   | -             | 5484066       | [1]                          |
| 9  | Quercetin-3, 4'-di-Glc        | 3.855          | C <sub>27</sub> H <sub>30</sub> O <sub>17</sub> | [M+H] <sup>+</sup> | 627.1578      | [M+Na] <sup>+</sup> | 649.1403      | 5320835       | [1]                          |
| 10 | Quercetin-3-(malonyl-Glc)-Glc | 3.888          | C <sub>30</sub> H <sub>32</sub> O <sub>20</sub> | [M+H] <sup>+</sup> | 713.1576      | [M+Na] <sup>+</sup> | 735.1489      | 74978238      | [1]                          |
| 11 | Caffeoyl malic acid           | 4.021          | C <sub>13</sub> H <sub>12</sub> O <sub>8</sub>  | [M+H] <sup>+</sup> | 297.0623      | [M+Na] <sup>+</sup> | 319.0429      | 6124299       | [3]                          |
| 12 | Scopoletin                    | 4.337          | C <sub>10</sub> H <sub>8</sub> O <sub>4</sub>   | [M+H] <sup>+</sup> | 193.0499      | [M+Na] <sup>+</sup> | 215.0306      | 5280460       | [4]                          |
| 13 | Luteolin 3', 7-O-di-Glc       | 4.371          | C <sub>27</sub> H <sub>30</sub> O <sub>16</sub> | [M+H] <sup>+</sup> | 611.1635      | [M+Na] <sup>+</sup> | 633.1416      | 5490298       | [1]                          |
| 14 | Quercetin-3-O-Ara             | 4.504          | C <sub>20</sub> H <sub>18</sub> O <sub>11</sub> | [M+H] <sup>+</sup> | 435.0931      | [M+Na] <sup>+</sup> | 457.0769      | 12309865      | [1, 2]                       |
| 15 | Chlorogenic acid              | 4.504          | C <sub>16</sub> H <sub>18</sub> O <sub>9</sub>  | [M+H] <sup>+</sup> | 355.1026      | [M+Na] <sup>+</sup> | 377.0855      | 1794427       | Standard, [1, 3]             |
| 16 | L-chicoric acid               | 4.504          | C <sub>22</sub> H <sub>18</sub> O <sub>12</sub> | [M+H] <sup>+</sup> | 475.0878      | [M+Na] <sup>+</sup> | 497.0702      | 5281764       | [1, 2, 3]                    |
| 17 | Luteolin 7-O-Rhamnoside       | 4.851          | C <sub>27</sub> H <sub>30</sub> O <sub>15</sub> | [M+H] <sup>+</sup> | 595.1652      | [M+Na] <sup>+</sup> | 617.1558      | 4636593       | Standard, [1, 2]             |
| 18 | 3,5-di-O-caffeoylquinic acid  | 4.903          | C <sub>25</sub> H <sub>24</sub> O <sub>12</sub> | [M+H] <sup>+</sup> | 517.1352      | -                   | -             | 6474310       | [1]                          |
| 19 | Luteolin 7-O-Glc              | 4.947          | C <sub>21</sub> H <sub>20</sub> O <sub>11</sub> | [M+H] <sup>+</sup> | 449.1085      | [M+Na] <sup>+</sup> | 471.0867      | 5282149       | Standard,[1,2,3]             |
| 20 | Rosmarinic acid               | 5.268          | C <sub>18</sub> H <sub>16</sub> O <sub>8</sub>  | -                  | -             | [M+Na] <sup>+</sup> | 383.0742      | 5281792       | [4]                          |
| 21 | Luteolin                      | 6.073          | C <sub>15</sub> H <sub>10</sub> O <sub>6</sub>  | [M+H] <sup>+</sup> | 587.0527      | -                   | -             | 5280445       | Standard, [3]                |

Glc: glucoside, Gal: galactoside, Ara: arabinoside

## S2. Q-TOF spectra for standard compounds

### Rosmarinic acid

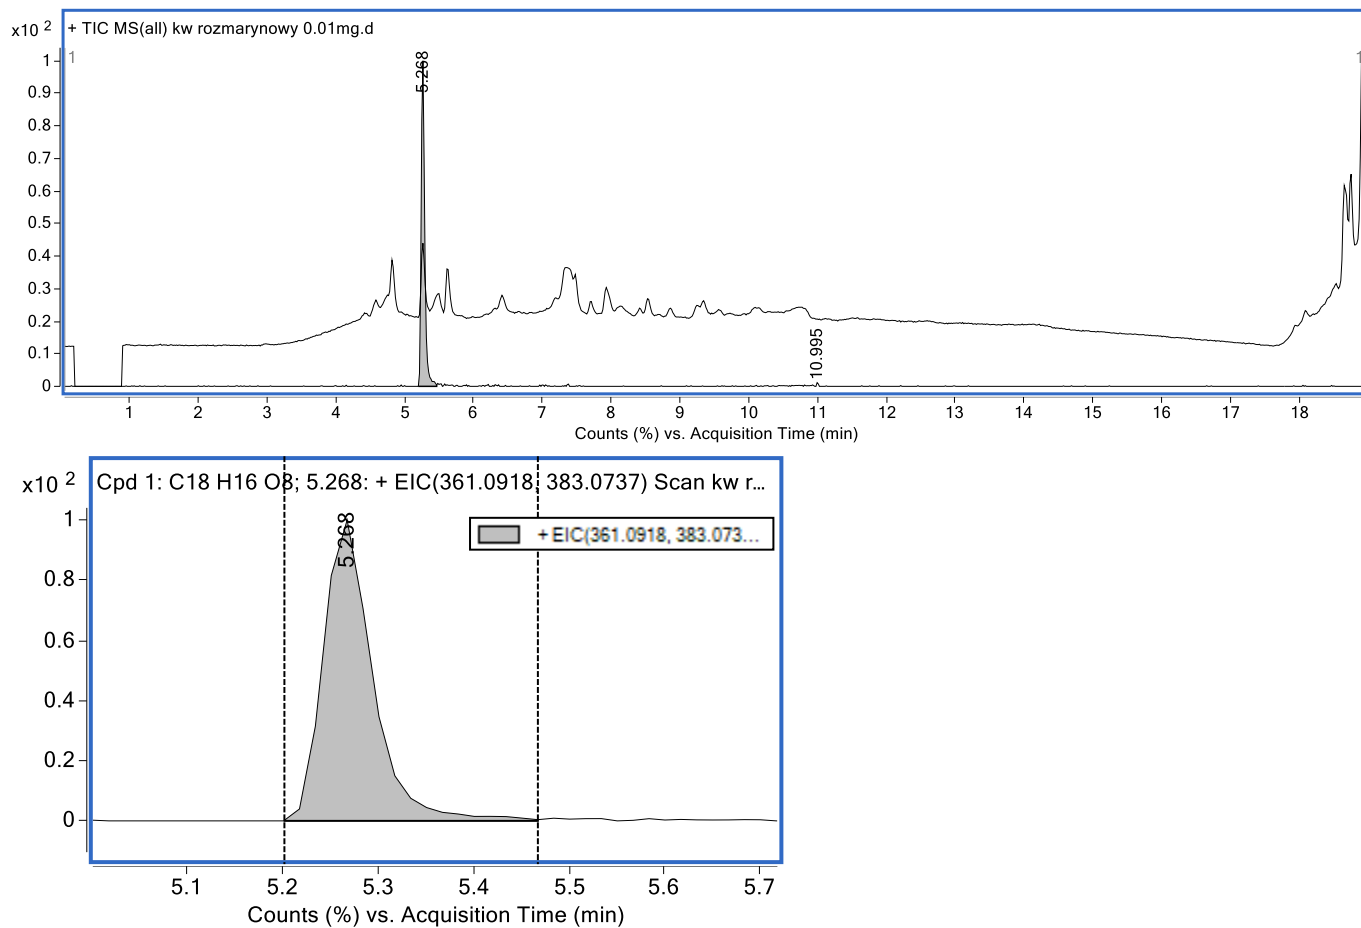

### Chlorogenic acid

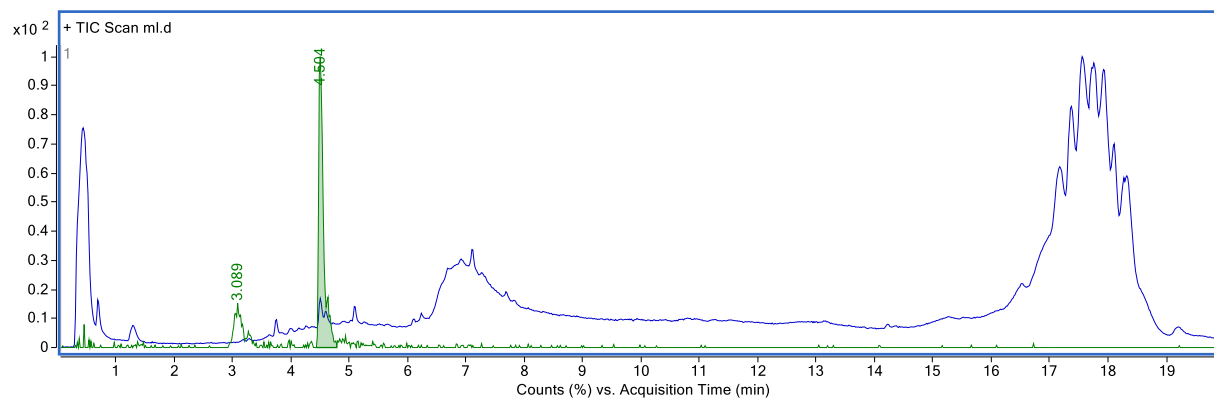

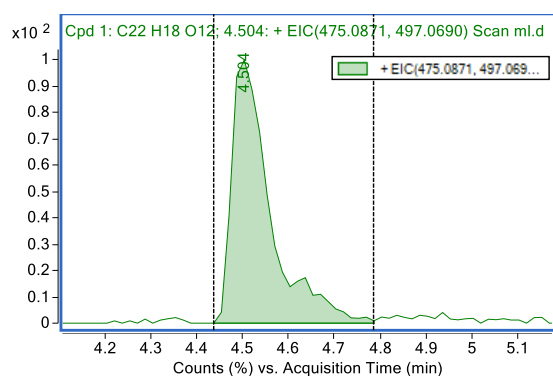

### Luteolin 7-O-rhamnoside

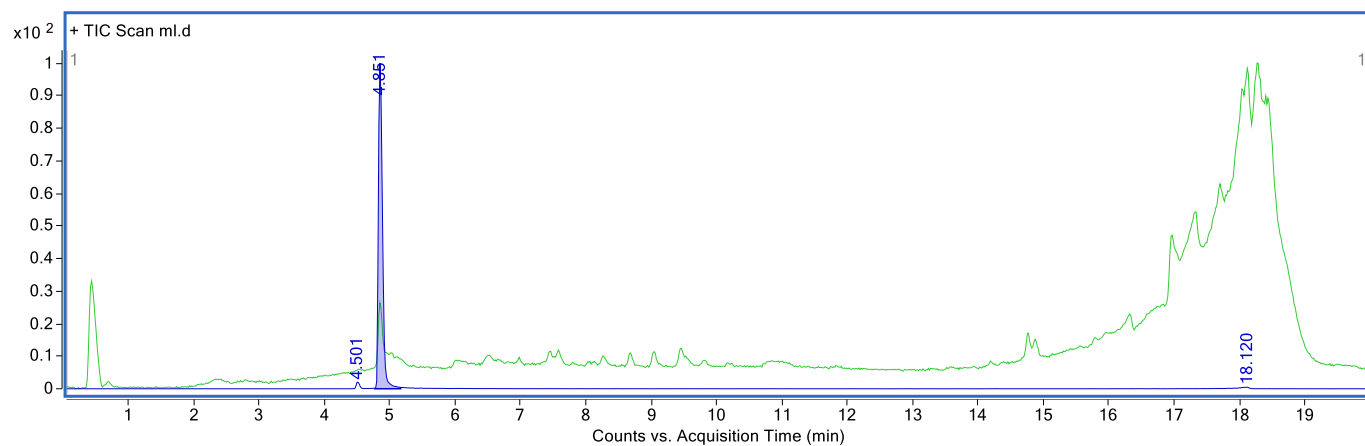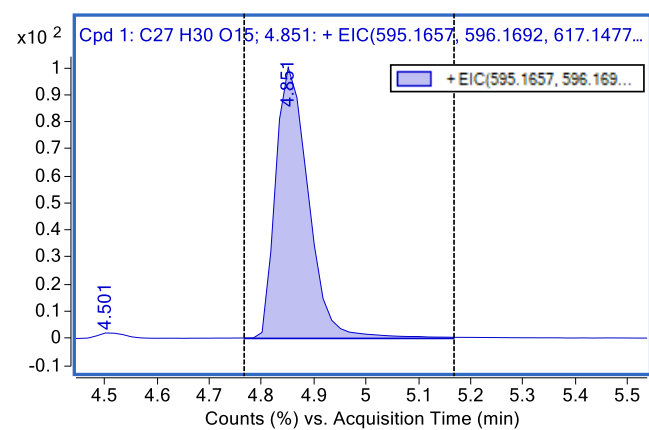

**Luteolin 7-O-glucoside**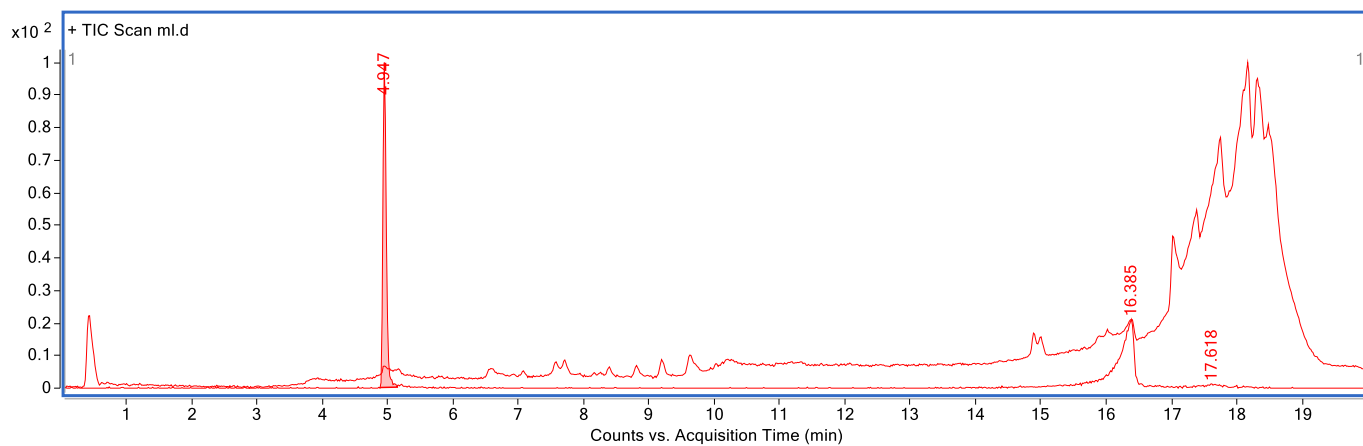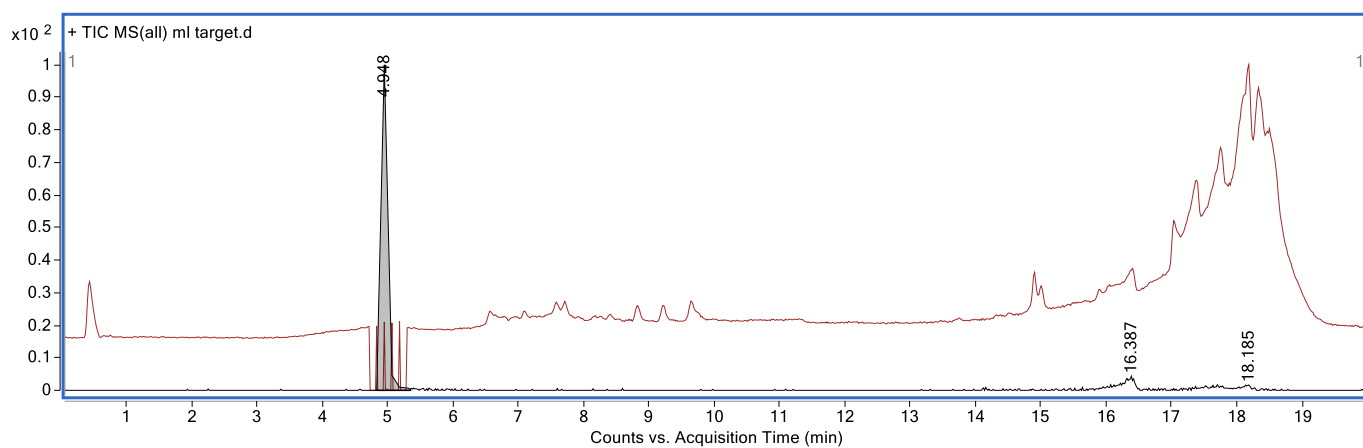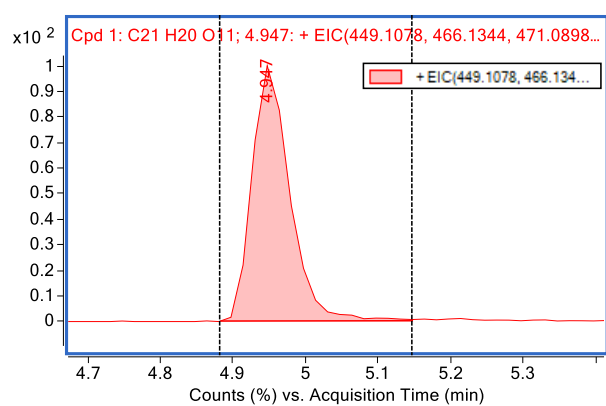

**Luteolin**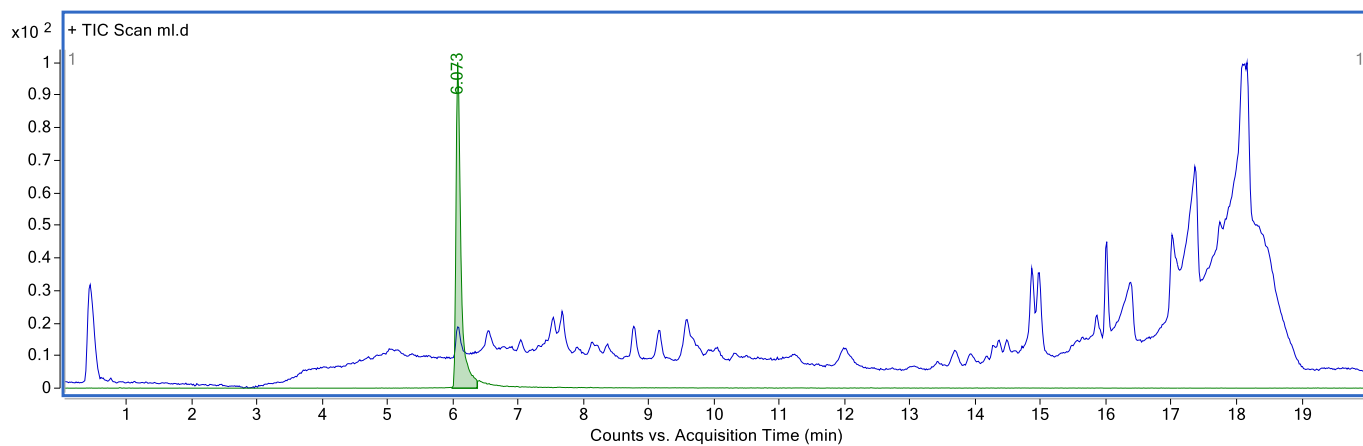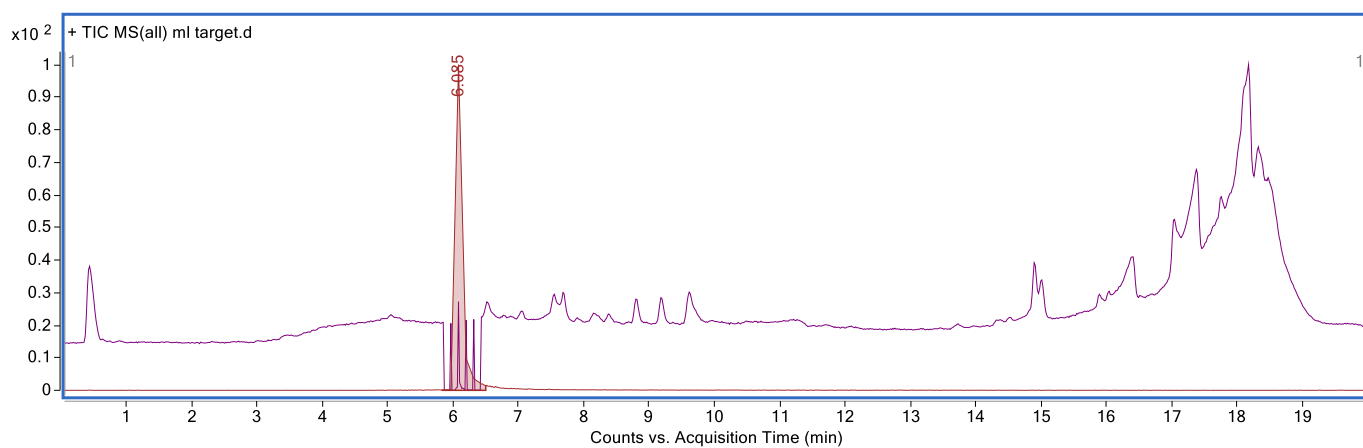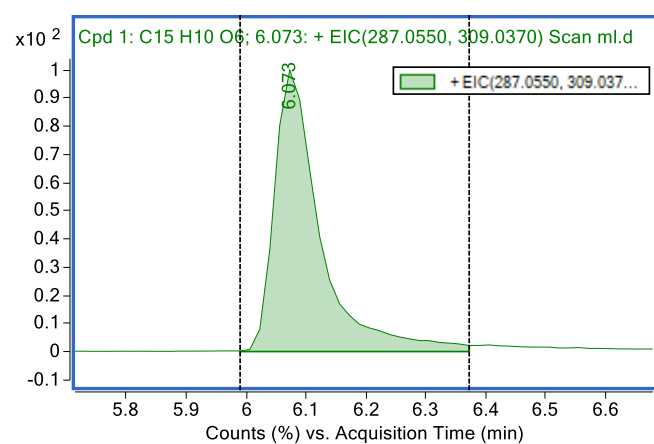

## References

- [1]. Chen H.J., Inbaraj B.S., Chen B.H. Determination of phenolic acids and flavonoids in *Taraxacum formosanum* Kitam by liquid chromatography- tandem mass spectrometry coupled with a post-column derivatization technique. *Int. J. Mol. Sci.* 2012, 13, 260-285; doi: 10.3390/ijms13010260.
- [2]. Diaz M.I., Barros L., Alves R.C., Oliveira M.B., Santos-Buelga C., Ferreira I., Nutritional composition, antioxidant activity and phenolic compounds of wild *Taraxacum* sect. *Ruderalia*. *Food Res. Int.* 2014, 56, 266-271. Doi: 10.1016/j.foodres.2014.01.003
- [3]. Mišek M., Marcincakova D., Legath J. Polyphenols content, antioxidant activity and cytotoxic assessment of *Taraxacum officinale* extracts prepared through the micelle-mediated extraction method. *Molecules*, 2019, 24, 1025, DOI: 10.3390/molecules24061025
- [4]. Fan M., Zhang X., Song H., Zhang Y. Dandelion (*Taraxacum* genus): A review of chemical constituents and pharmacological effects. *Molecules*, 2023, 28, 5022, doi: 10.3390/molecules28135022
